# Supplementary material for: Preeclampsia Prevalence, Risk Factors, and Pregnancy Outcomes in Sweden and China
Source: PubMed Central journal article supplement (PMC8111481; doi:10.1001/jamanetworkopen.2021.8401), 2021-05-10

## Supplemental Online Content

Yang Y, Le Ray I, Zhu J, Zhang J, Hua J, Reilly M. Preeclampsia prevalence, risk factors, and pregnancy outcomes in Sweden and China. *JAMA Netw Open*. 2021;4(5):e218401. doi:10.1001/jamanetworkopen.2021.8401

**eTable 1.** Summary of Chinese Hypertensive Disorders in Pregnancy Guidelines (2015 Edition) and Translated Guidelines From the Swedish Society of Obstetrics and Gynecology

**eTable 2.** Adjusted Odds Ratios From Multivariable Logistic Regression Model

**eTable 3.** Neonatal Outcomes of Singleton Pregnancies in Sweden and China

**eTable 4.** Comparison of Pregnancy Outcomes Among Singleton Pregnancies in Sweden and China

**eFigure.** Annual Prevalence of Hypertensive Disorders in Pregnancy in Sweden from 2002 to 2012

This supplemental material has been provided by the authors to give readers additional information about their work.

**eTable 1. Summary of Chinese Hypertensive Disorders in Pregnancy Guidelines (2015 Edition)<sup>1</sup> and Translated Guidelines From the Swedish Society of Obstetrics and Gynecology<sup>2</sup>**

|                          | <b>China</b>                                                                                                                                                                                                                                                                                                                                                                                                                                                                                                                                                                                                                                                                                                                                                                                                                                                                                                            | <b>Sweden</b>                                                                                                                                                                                                                                                                                                                                                                                                                                                                                                                                                                                                                                             |
|--------------------------|-------------------------------------------------------------------------------------------------------------------------------------------------------------------------------------------------------------------------------------------------------------------------------------------------------------------------------------------------------------------------------------------------------------------------------------------------------------------------------------------------------------------------------------------------------------------------------------------------------------------------------------------------------------------------------------------------------------------------------------------------------------------------------------------------------------------------------------------------------------------------------------------------------------------------|-----------------------------------------------------------------------------------------------------------------------------------------------------------------------------------------------------------------------------------------------------------------------------------------------------------------------------------------------------------------------------------------------------------------------------------------------------------------------------------------------------------------------------------------------------------------------------------------------------------------------------------------------------------|
| Gestational hypertension | Systolic BP $\geq$ 140 mmHg and (or) diastolic BP $\geq$ 90 mmHg after 20 weeks gestation in a woman with a previously normal blood pressure                                                                                                                                                                                                                                                                                                                                                                                                                                                                                                                                                                                                                                                                                                                                                                            | Blood pressure $\geq$ 140 mm Hg systolic and 90 mm Hg diastolic, measured on two occasions at least 4 hours apart, after 20 weeks pregnancy.                                                                                                                                                                                                                                                                                                                                                                                                                                                                                                              |
| Preeclampsia             | Gestational hypertension and proteinuria ( $\geq$ 0.3g/24h or protein / creatinine ratio $\geq$ 0.3 or dipstick reading of 1+ (used only if other quantitative methods not available) OR (in the absence of proteinuria) new-onset hypertension with onset of any of (i) impaired organ (ii) abnormality of blood, digestive or nervous system (iii) Placenta-fetal involvement                                                                                                                                                                                                                                                                                                                                                                                                                                                                                                                                         | Gestational hypertension and proteinuria ( $\geq$ 300 mg / 24 hours)                                                                                                                                                                                                                                                                                                                                                                                                                                                                                                                                                                                      |
| Severe preeclampsia      | preeclampsia with any of the following:<br>(1) Continuously increasing hypertension: systolic blood pressure $\geq$ 160 mmHg and (or) diastolic blood pressure $\geq$ 110 mmHg<br>(2) Cerebral or visual symptoms: continuous headache or visual disturbance<br>(3) Impaired liver: continuous upper abdominal pain and hepatic subcapsular hematoma or liver rupture<br>(4) Abnormally elevated blood concentrations of liver enzymes (ALT or AST)<br>(5) Impaired renal function: proteinuria $\geq$ 2.0g/24h, oliguria (urine $<$ 400 ml/24h, or $<$ 17ml/h)<br>(6) Hypoproteinemia with ascites, pleural effusion or pericardial effusion<br>(7) Thrombocytopenia: platelet count $<$ 100 $\times$ 10 <sup>9</sup> /L; microvascular hemolysis (anemia, jaundice or elevated LDH)<br>(8) Heart failure<br>(9) Pulmonary edema<br>(10) Fetal growth restriction, oligohydramnios, fetal death or placental abruption | Preeclampsia with any of the following:<br>(1) systolic blood pressure $\geq$ 160 mm Hg (on two occasions with at least 4 hours interval unless on antihypertensive treatment)<br>(2) diastolic blood pressure $\geq$ 110 mm Hg (on two occasions with at least 4 hours interval unless on antihypertensive),<br>(3) new onset cerebral symptoms or visual changes<br>(4) severe pain in the epigastric area or under the right arc without other etiology<br>(5) affected liver enzymes (twice the upper normal value)<br>(6) oliguria ( $<$ 500 ml / day),<br>(7) pulmonary edema or cyanosis,<br>(8) thrombocytopenia ( $<$ 100 x10 <sup>9</sup> / L), |
| HELLP                    | (1) Intravascular hemolysis: the presence of broken red blood cells and spherical red blood cells in peripheral blood smear; Bilirubin $\geq$ 20.5 $\mu$ mol/L (1.2 mg/dl); Hemoglobin slightly decreased; the level of LDH increased.<br>(2) Increased liver enzyme levels: ALT $\geq$ 40 U/L or AST $\geq$ 70 U/L.<br>(3) Decrease in platelet count: platelet count $<$ 100 $\times$ 10 <sup>9</sup> /L.                                                                                                                                                                                                                                                                                                                                                                                                                                                                                                             | Hemolysis determined by haptoglobin or LD, platelets $<$ 100 x10 <sup>9</sup> / L, and ASAT or ALAT $\geq$ 1.2 $\mu$ kat/L (equal to 70 U/L).                                                                                                                                                                                                                                                                                                                                                                                                                                                                                                             |
| Eclampsia                | The presence of general convulsions in a woman with preeclampsia, which cannot be explained by other causes occur.                                                                                                                                                                                                                                                                                                                                                                                                                                                                                                                                                                                                                                                                                                                                                                                                      | General convulsions during pregnancy, childbirth or the first few weeks after delivery in patients with preeclampsia that cannot be explained by other causes (for example, epilepsy).                                                                                                                                                                                                                                                                                                                                                                                                                                                                    |

Source: 1. Hypertension disorders of pregnancy Group, Chinese Society of Obstetrics and Gynecology, Chinese Medical Association. Diagnosis and treatment Guideline for hypertension disorders of pregnancy (2015), Chin J Obstet Gynecol, 2015; 50(10):721-728.  
2. [https://www.sfog.se/natupplaga/ARG72\\_komplett\\_LRbf4f5598-2309-4013-8dea-3cbb534708ee.pdf](https://www.sfog.se/natupplaga/ARG72_komplett_LRbf4f5598-2309-4013-8dea-3cbb534708ee.pdf)

**eTable 2. Adjusted Odds Ratios From Multivariable Logistic Regression Model<sup>a</sup>**

| Variable                      | Mild Preeclampsia |                  | Severe Preeclampsia |                  |
|-------------------------------|-------------------|------------------|---------------------|------------------|
|                               | Sweden            | China (weighted) | Sweden              | China (weighted) |
| Maternal age at delivery ≥35  | 1.31 (1.24-1.38)  | 2.15 (1.50-3.08) | 1.50 (1.39-1.62)    | 1.87 (1.44-2.43) |
| BMI*                          |                   |                  |                     |                  |
| Underweight                   | 0.73 (0.61-0.87)  | 0.41 (0.18-0.91) | 0.75 (0.59-0.96)    | 0.68 (0.46-0.99) |
| Overweight                    | 1.81 (1.72-1.90)  | 3.20 (2.02-5.06) | 1.44 (1.35-1.55)    | 2.12 (1.49-3.03) |
| Obese                         | 3.49 (3.31-3.67)  | 5.12 (3.82-6.86) | 2.31 (2.13-2.50)    | 4.01 (2.96-5.43) |
| Nulliparous                   | 2.97 (2.84-3.10)  | 2.11 (1.37-3.26) | 3.91 (3.65-4.18)    | 1.65 (1.20-2.25) |
| Multiple gestation            | 4.52 (4.11-4.97)  | 2.33 (1.28-4.25) | 5.78 (5.11-6.54)    | 4.11 (3.30-5.12) |
| History of diabetes           | 3.90 (3.38-4.49)  | 0.51 (0.19-1.37) | 5.06 (4.19-6.12)    | 1.68 (1.19-2.35) |
| Gestational diabetes Mellitus | 1.90 (1.67-2.17)  | 0.73 (0.47-1.13) | 1.62 (1.31-2.01)    | 1.57 (1.14-2.16) |

\*Reference group: normal BMI.

<sup>a</sup>Results for China are from weighted logistic regression.

**eTable 3.** Neonatal Outcomes of Singleton Pregnancies in Sweden and China<sup>a,b</sup>

|                                     | <b>Sweden</b>    | <b>China</b>     | <b>P-value</b> |
|-------------------------------------|------------------|------------------|----------------|
| N                                   | (547219)         | 77,512           |                |
| Gestational age at delivery (weeks) | 40.0 (39.0-41.0) | 39.0 (38.0-40.0) | <0.001         |
| Preterm                             | 24870 (4.5)      | 6,157 (6.7)      | <0.001         |
| Birth weight (g)                    | 3555 (3220-3890) | 3300 (3000-3600) | <0.001         |
| Low birth weight                    | 15710 (2.9)      | 4,105 (4.6)      | <0.001         |
| Low 5-minute Apgar score            | 6889(1.3)        | 801 (1.0)        | <0.001         |
| Stillbirth                          | 1753 (0.3)       | 846 (1.1)        | <0.001         |

<sup>a</sup>Values for China are presented as weighted median (quartiles) or observed/unweighted n (weighted %).

<sup>b</sup>Median (quartiles) are reported for continuous variables and n(%) for categorical variables.

**eTable 4. Comparison of pregnancy outcomes among singleton pregnancies in Sweden and China<sup>a</sup>.**

|                           | Sweden           | China            | P      | Sweden           | China            | P      |
|---------------------------|------------------|------------------|--------|------------------|------------------|--------|
| N                         | 9611             | 535              |        | 4888             | 1,117            |        |
| Gestational age           | 39.0 (38.0-40.0) | 38.0 (37.0-39.0) | <0.001 | 37.0 (35.0-39.0) | 37.0 (34.0-38.0) | 0.006  |
| Preterm                   | 812(8.5)         | 77 (12.8)        | <0.001 | 2,094 (42.8)     | 515 (37.9)       | <0.001 |
| Birth weight              | 3400 (2965-3825) | 3300 (2900-3650) | <0.001 | 2785 (2125-3345) | 2700 (1970-3230) | <0.001 |
| Low birthweight*          | 916 (9.5)        | 50 (10.1)        | 0.05   | 1821(37.5)       | 453 (37.1)       | 0.55   |
| Low 5-minute Apgar score* | 207 (2.2)        | 1 (0.4)          | <0.001 | 273 (5.6)        | 58 (6.1)         | 0.19   |
| Stillbirth                | 27 (0.3)         | 0 (0)            | -      | 33 (0.7)         | 66 (6.9)         | <0.001 |

<sup>a</sup>Values for China are presented as weighted median (quartiles) or observed/unweighted n (weighted %).

<sup>b</sup>Median (quartiles) are reported for continuous variables and No. (%) for categorical variables.

<sup>c</sup>Low birth weight available in Swedish data for 9605 and 4856 of mild and severe respectively, and low Apgar score for 9569 and 4840.

**eFigure. Annual Prevalence of Hypertensive Disorders in Pregnancy in Sweden from 2002 to 2012**

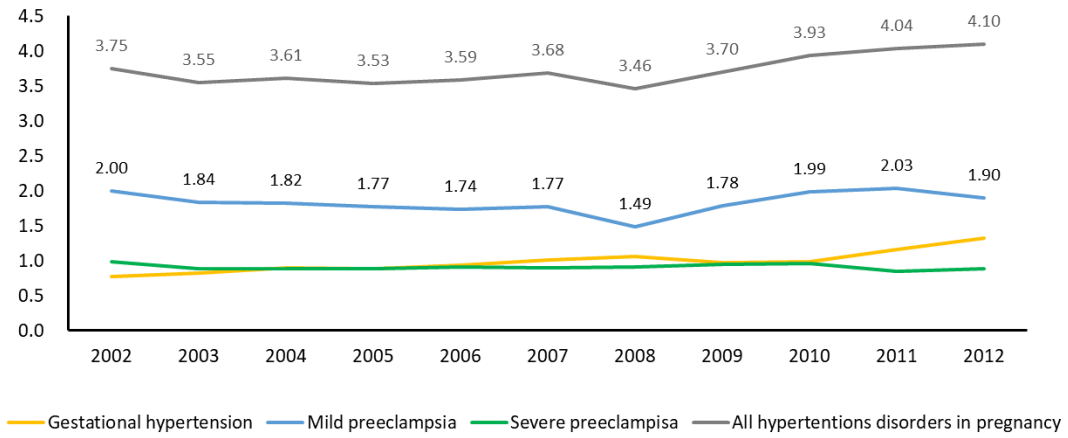

Supplement: jamanetwopen-e218401-s001.pdf [file jamanetwopen-e218401-s001.pdf]
